# Supplementary material for: Transcriptomic Complexity of Aspergillus terreus Velvet Gene Family under the Influence of Butyrolactone I
Source: MDPI journal article supplement (doi:10.3390/microorganisms5010012), 2017-03-14

Figure S3. Gene expression data in quartiles after normalisation and filtering

Probe signal values

15  
10  
5  
0

A2-120hrs  
A2-144hrs  
A2-216hrs  
A2-24hrs  
A2-48hrs  
A2-96hrs  
A3-120hrs  
A3-144hrs  
A3-216hrs  
A3-24hrs  
A3-48hrs  
A3-96hrs  
C1-120hrs  
C1-144hrs  
C1-216hrs  
C1-24hrs  
C1-48hrs  
C1-96hrs  
C2-120hrs  
C2-144hrs  
C2-216hrs  
C2-24hrs  
C2-48hrs  
C2-96hrs  
C3-120hrs  
C3-144hrs  
C3-216hrs  
C3-24hrs  
C3-48hrs  
C3-96hrs  
D1-120hrs  
D1-144hrs  
D1-216hrs  
D1-24hrs  
D1-48hrs  
D1-96hrs  
D2-120hrs  
D2-144hrs  
D2-216hrs  
D2-24hrs  
D2-48hrs  
D2-96hrs  
D3-120hrs  
D3-144hrs  
D3-216hrs  
D3-24hrs  
D3-48hrs  
D3-96hrs  
E1-120hrs  
E1-144hrs  
E1-216hrs  
E1-24hrs  
E1-48hrs  
E1-96hrs  
E2-120hrs  
E2-144hrs  
E2-216hrs  
E2-24hrs  
E2-48hrs  
E2-96hrs  
E3-120hrs  
E3-144hrs  
E3-216hrs  
E3-24hrs  
E3-48hrs  
E3-96hrs

Sample microarrays

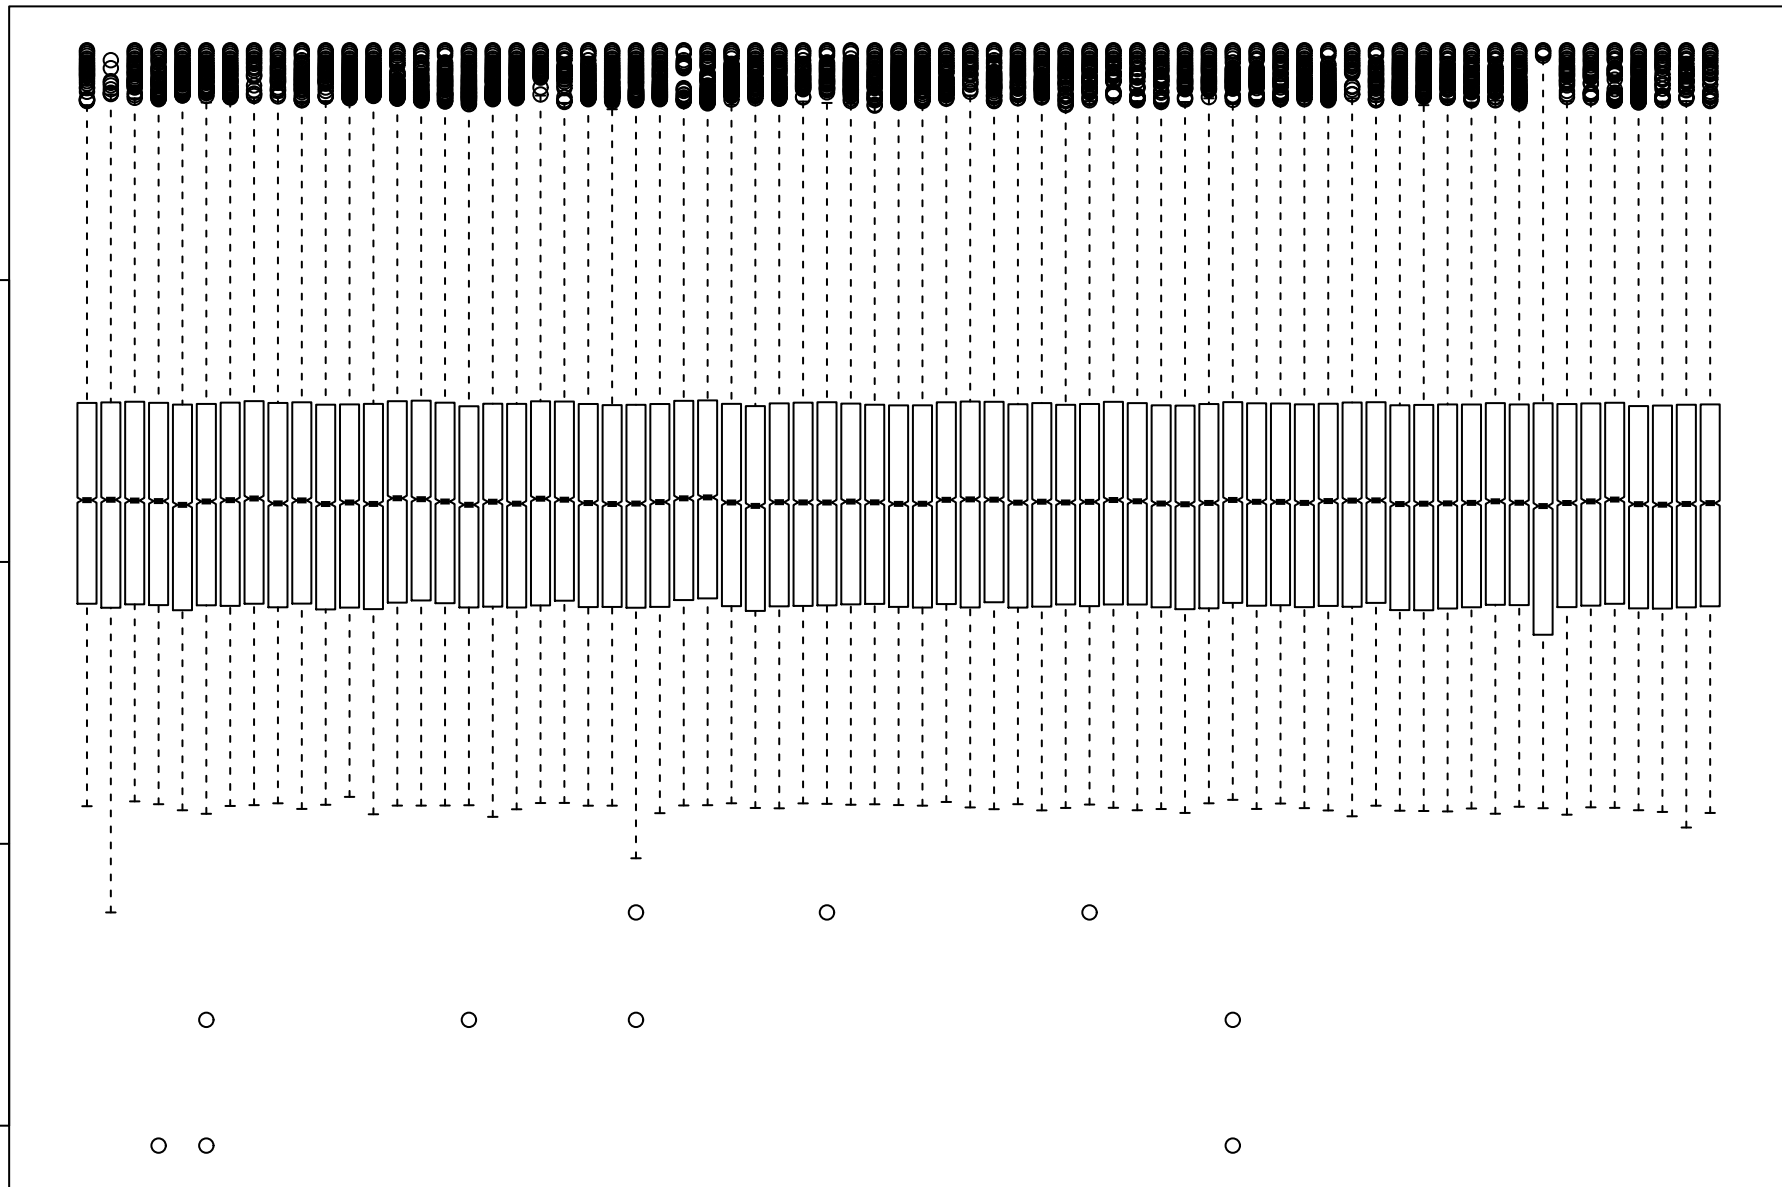

Supplement: s1 [file s1]
