# Supplementary material for: Transcriptomic Complexity of Aspergillus terreus Velvet Gene Family under the Influence of Butyrolactone I
Source: MDPI journal article supplement (doi:10.3390/microorganisms5010012), 2017-03-14
Supplement: s1 [file s1]

**Figure S4.** Multiple sequence alignment (CLUSTAL 0(1.2.2)) of *A. terreus* MUCL38669 VosA splice variants with predicted protein domains as indicated.

|                    |                                                               |                  |  |
|--------------------|---------------------------------------------------------------|------------------|--|
|                    |                                                               | pfam11754 Velvet |  |
| VosA-alpha 430aa   | MSASTFSDASLARDPQSSEFDLIIRQQPTRARVAGGKEKERKPVDPPIVQIRVKEDGTY   | 60               |  |
| VosA-beta 350aa    | MSASTFSDASLARDPQSSEFDLIIRQQPTRARVAGGKEKERKPVDPPIVQIRVKEDGTY   | 60               |  |
| VosA-gamma 348aa   | MSASTFSDASLARDPQSSEFDLIIRQQPTRARVAGGKEKERKPVDPPIVQIRVKEDGTY   | 60               |  |
| VosA-delta 140aa   | MSASTFSDASLARDPQSSEFDLIIRQQPTRARVAGGKEKERKPVDPPIVQIRVKEDGTY   | 60               |  |
| VosA-epsilon 418aa | -----MLSPSEFDLIIRQQPTRARVAGGKEKERKPVDPPIVQIRVKEDGTY           | 48               |  |
| VosA-zeta 338aa    | -----MLSPSEFDLIIRQQPTRARVAGGKEKERKPVDPPIVQIRVKEDGTY           | 48               |  |
| VosA-eta 336aa     | -----MLSPSEFDLIIRQQPTRARVAGGKEKERKPVDPPIVQIRVKEDGTY           | 48               |  |
| VosA-theta 128aa   | -----MLSPSEFDLIIRQQPTRARVAGGKEKERKPVDPPIVQIRVKEDGTY           | 48               |  |
|                    | *****                                                         |                  |  |
|                    | pfam11754 Velvet                                              |                  |  |
| VosA-alpha 430aa   | LASHYLQSPYYFMCCSLYDATEDTPVPVPPSTALTGTLVSSLHRLKVDNTDGGFFVFGD   | 120              |  |
| VosA-beta 350aa    | LASHYLQSPYYFMCCSLYDATEDTPVPVPPSTALTGTLVSSLHRLKVDNTDGGFFVFGD   | 120              |  |
| VosA-gamma 348aa   | LASHYLQSPYYFMCCSLYDATEDTPVPVPPSTALTGTLVSSLHRLKVDNTDGGFFVFGD   | 120              |  |
| VosA-delta 140aa   | LASHYLQSPYYFMCCSLYDATEDTPVPVPPSTALTGTLVSSLHRLKVDNTDGGFFVFGD   | 120              |  |
| VosA-epsilon 418aa | LASHYLQSPYYFMCCSLYDATEDTPVPVPPSTALTGTLVSSLHRLKVDNTDGGFFVFGD   | 108              |  |
| VosA-zeta 338aa    | LASHYLQSPYYFMCCSLYDATEDTPVPVPPSTALTGTLVSSLHRLKVDNTDGGFFVFGD   | 108              |  |
| VosA-eta 336aa     | LASHYLQSPYYFMCCSLYDATEDTPVPVPPSTALTGTLVSSLHRLKVDNTDGGFFVFGD   | 108              |  |
| VosA-theta 128aa   | LASHYLQSPYYFMCCSLYDATEDTPVPVPPSTALTGTLVSSLHRLKVDNTDGGFFVFGD   | 108              |  |
|                    | *****                                                         |                  |  |
|                    | pfam11754 Velvet                                              |                  |  |
| VosA-alpha 430aa   | LSVKIEGDFRLKFTLFEMRKEMVYYLKSIIISERFTVSPPKSFPGMAESTFLSRSFADQGV | 180              |  |
| VosA-beta 350aa    | LSVKIEGDFRLKFTLFEMRKEMVYYLKSIIISERFTVSPPKSFPGMAESTFLSRSFADQGV | 180              |  |
| VosA-gamma 348aa   | LSVKIEGDFRLKFTLFEMRKEMVYYLKSIIISERFTVSPPKSFPGMAESTFLSRSFADQGV | 180              |  |
| VosA-delta 140aa   | LSVKIEGDFRLKFTLFEMRK-----                                     | 140              |  |
| VosA-epsilon 418aa | LSVKIEGDFRLKFTLFEMRKEMVYYLKSIIISERFTVSPPKSFPGMAESTFLSRSFADQGV | 168              |  |
| VosA-zeta 338aa    | LSVKIEGDFRLKFTLFEMRKEMVYYLKSIIISERFTVSPPKSFPGMAESTFLSRSFADQGV | 168              |  |
| VosA-eta 336aa     | LSVKIEGDFRLKFTLFEMRKEMVYYLKSIIISERFTVSPPKSFPGMAESTFLSRSFADQGV | 168              |  |
| VosA-theta 128aa   | LSVKIEGDFRLKFTLFEMRK-----                                     | 128              |  |
|                    | *****                                                         |                  |  |
|                    | pfam11754 Velvet   cl21454 NADB_Rossmann superfamily          |                  |  |
| VosA-alpha 430aa   | KLRIRKEPRTLIRKQVPRPEDYPQPLPPRSPDRISMQMPGSAFGGYPAAGRDYGYYSNPV  | 240              |  |
| VosA-beta 350aa    | KLRIRKEPRTLIRKQVPRPEDYPQPLPPRSPDRISMQMPGSAFGGYPAAGRDYGYYSNPV  | 240              |  |
| VosA-gamma 348aa   | KLRIRKEPRTLIRKQVPRPEDYPQPLPPRSPDRISMQMPGSAFGGYPAAGRDYGYYSNPV  | 240              |  |
| VosA-delta 140aa   | -----                                                         | 140              |  |
| VosA-epsilon 418aa | KLRIRKEPRTLIRKQVPRPEDYPQPLPPRSPDRISMQMPGSAFGGYPAAGRDYGYYSNPV  | 228              |  |
| VosA-zeta 338aa    | KLRIRKEPRTLIRKQVPRPEDYPQPLPPRSPDRISMQMPGSAFGGYPAAGRDYGYYSNPV  | 228              |  |
| VosA-eta 336aa     | KLRIRKEPRTLIRKQVPRPEDYPQPLPPRSPDRISMQMPGSAFGGYPAAGRDYGYYSNPV  | 228              |  |
| VosA-theta 128aa   | -----                                                         | 128              |  |
|                    | cl21454 NADB_Rossmann superfamily                             |                  |  |
| VosA-alpha 430aa   | KRQRTSMDFGPRGVYDADGRMRQVEAYPQAAAMYSNPPGAYQTPMVPGYPTGHAGVPDYS  | 300              |  |
| VosA-beta 350aa    | KRQRTSMDFGPRGVYDADGRMRQVEAYPQAAAMYSNPPGAYQTPMVPGYPTGHAGVPDYS  | 300              |  |
| VosA-gamma 348aa   | KRQRTSMDFGPRGVYDADGRMRQVEAYPQAAAMYSNPPGAYQTPMVPGYPTGHAGVPDYS  | 300              |  |
| VosA-delta 140aa   | -----                                                         | 140              |  |
| VosA-epsilon 418aa | KRQRTSMDFGPRGVYDADGRMRQVEAYPQAAAMYSNPPGAYQTPMVPGYPTGHAGVPDYS  | 288              |  |
| VosA-zeta 338aa    | KRQRTSMDFGPRGVYDADGRMRQVEAYPQAAAMYSNPPGAYQTPMVPGYPTGHAGVPDYS  | 288              |  |
| VosA-eta 336aa     | KRQRTSMDFGPRGVYDADGRMRQVEAYPQAAAMYSNPPGAYQTPMVPGYPTGHAGVPDYS  | 288              |  |
| VosA-theta 128aa   | -----                                                         | 128              |  |
|                    | cl21454 NADB_Rossmann superfamily                             |                  |  |
| VosA-alpha 430aa   | LSYGMSAQVPQMOPGAHGRSSQATMQPFGMANAPGTPADATGAMMQQGYPRGQYQTG     | 360              |  |
| VosA-beta 350aa    | LSYGMSAQVPQMOPGAHGRSSQATMQPFGMANAPGTPFWDQQTRQER-----          | 350              |  |
| VosA-gamma 348aa   | LSYGMSAQVPQMOPGAHGRSSQATMQPFGMANAPGTPVCIDSHVSD-----           | 348              |  |
| VosA-delta 140aa   | -----                                                         | 140              |  |
| VosA-epsilon 418aa | LSYGMSAQVPQMOPGAHGRSSQATMQPFGMANAPGTPADATGAMMQQGYPRGQYQTG     | 348              |  |
| VosA-zeta 338aa    | LSYGMSAQVPQMOPGAHGRSSQATMQPFGMANAPGTPFWDQQTRQER-----          | 338              |  |
| VosA-eta 336aa     | LSYGMSAQVPQMOPGAHGRSSQATMQPFGMANAPGTPVCIDSHVSD-----           | 336              |  |
| VosA-theta 128aa   | -----                                                         | 128              |  |

|                    |                                                              |     |
|--------------------|--------------------------------------------------------------|-----|
| VosA-alpha 430aa   | STILPPLQRSRNITQGSNGTPTRGYYDQSSQAATPILPSQPIGTNEAERYGLAPGQTAYE | 420 |
| VosA-beta 350aa    | -----                                                        | 350 |
| VosA-gamma 348aa   | -----                                                        | 348 |
| VosA-delta 140aa   | -----                                                        | 140 |
| VosA-epsilon 418aa | STILPPLQRSRNITQGSNGTPTRGYYDQSSQAATPILPSQPIGTNEAERYGLAPGQTAYE | 408 |
| VosA-zeta 338aa    | -----                                                        | 338 |
| VosA-eta 336aa     | -----                                                        | 336 |
| VosA-theta 128aa   | -----                                                        | 128 |

|                    |            |     |
|--------------------|------------|-----|
| VosA-alpha 430aa   | HPGSADGTPR | 430 |
| VosA-beta 350aa    | -----      | 350 |
| VosA-gamma 348aa   | -----      | 348 |
| VosA-delta 140aa   | -----      | 140 |
| VosA-epsilon 418aa | HPGSADGTPR | 418 |
| VosA-zeta 338aa    | -----      | 338 |
| VosA-eta 336aa     | -----      | 336 |
| VosA-theta 128aa   | -----      | 128 |
