# Supplementary material for: Transcriptomic Complexity of Aspergillus terreus Velvet Gene Family under the Influence of Butyrolactone I
Source: MDPI journal article supplement (doi:10.3390/microorganisms5010012), 2017-03-14
Supplement: s1 [file s1]

**Table S1.** Information of the sequence quality <sup>a</sup>.

| Paired end reads (PE) | Number of reads | Median read length (bp) | GC % | Per base sequence qualities: Phred score median (lower quartile) | Read duplication level <sup>b</sup> | Number of over-represented reads <sup>c</sup> | Number of enriched 5 bp kmers <sup>b</sup> |
|-----------------------|-----------------|-------------------------|------|------------------------------------------------------------------|-------------------------------------|-----------------------------------------------|--------------------------------------------|
| raw PE 1              | 18752589        | 101                     | 55   | ≥ 35.0 (≥ 30.5)                                                  | ≥ 78.26 %                           | 0                                             | 62                                         |
| raw PE 2              | 18752589        | 101                     | 55   | ≥ 33.5 (≥ 27.5)                                                  | ≥ 80.07 %                           | 0                                             | 59                                         |
| trimmed PE 1          | 18204865        | 101                     | 55   | ≥ 36.5 (≥ 33.5)                                                  | ≥ 65.68 %                           | 0                                             | 32                                         |
| trimmed PE 2          | 18204865        | 101                     | 55   | ≥ 35.2 (≥ 32.2)                                                  | ≥ 79.99 %                           | 0                                             | 60                                         |

<sup>a</sup> FastQC programme (version 0.10.1) was used to obtain the values; see File S1 for details

<sup>b</sup> Few specific transcripts were enriched as revealed by the distribution of the transcript FPKM values (Fig. S1)

<sup>c</sup> A read is overrepresented if the number of its duplicates > 0.1 % of total number of read sequences

**Table S2.** Facts of the assembled transcriptome.

|                                            |           |
|--------------------------------------------|-----------|
| Total number of transcripts                | 41695     |
| Total length of the assembly <sup>a</sup>  | 41.92 Mbp |
| Transcript minimum length                  | 125 bp    |
| Transcript maximum length                  | 13056 bp  |
| Transcript N50                             | 1796 bp   |
| Approximate sequence coverage <sup>b</sup> | 88        |

<sup>a</sup> The assembly contains also putative splice variants and antisense sequences

<sup>b</sup> Total number of trimmed reads (36.4 Million) with median length of 101 bp / assembly length (Mbp)
