# Supplementary material for: Transcriptomic Complexity of Aspergillus terreus Velvet Gene Family under the Influence of Butyrolactone I
Source: MDPI journal article supplement (doi:10.3390/microorganisms5010012), 2017-03-14
Supplement: s1 [file s1]

**Table S3.** ORF and intron locations of *A. terreus* MUCL38669 velvet family members and *laeA* transcripts on the strain NIH2624 genome.

| Gene          | ORF location        | Upstream intron | Intron locations                                                                                                                                                                                   | Genomic contig of NIH2624 |
|---------------|---------------------|-----------------|----------------------------------------------------------------------------------------------------------------------------------------------------------------------------------------------------|---------------------------|
| <i>veA</i>    | 1243137-1244906(-)  | ND              | -                                                                                                                                                                                                  | Supercontig_1.1           |
| <i>velB</i>   | 1816607-1817856(-)  | yes             | 1816881-1816935(-)<br>1817419-1817477(-)<br>1817558-1817610(-)<br>1818127-1818392(-) <sup>a</sup>                                                                                                  | Supercontig_1.6           |
| <i>velC</i>   | 2136789-2138241(+)  | yes             | 2136283-2136443(+) <sup>a</sup><br>2137205-2137331(+)                                                                                                                                              | Supercontig_1.1           |
|               |                     | no              | 2137205-2137331(+)                                                                                                                                                                                 |                           |
| <i>vosA-α</i> | 1207293-1209313(+)  | no              | 1207343-1207443(+)<br>1207512-1207615(+)<br>1207686-1207763(+)<br>1207910-1207975(+)<br>1208061-1208149(+)<br>1208197-1208254(+)<br>1208364-1208414(+)<br>1208740-1208861(+)<br>1208979-1209037(+) | Supercontig_1.5           |
| <i>vosA-β</i> | 1207293-1209062(+)  | no              | 1207343-1207443(+)<br>1207512-1207615(+)<br>1207686-1207763(+)<br>1207910-1207975(+)<br>1208061-1208149(+)<br>1208197-1208254(+)<br>1208364-1208414(+)<br>1208740-1208861(+)<br>1208979-1209026(+) |                           |
| <i>vosA-γ</i> | 1207293-1209008(+)  | no              | 1207343-1207443(+)<br>1207512-1207615(+)<br>1207686-1207763(+)<br>1207910-1207975(+)<br>1208061-1208149(+)<br>1208197-1208254(+)<br>1208364-1208414(+)<br>1208740-1208861(+)                       |                           |
| <i>vosA-δ</i> | 1207293- 1208064(+) | no              | 1207343-1207443(+)<br>1207512-1207615(+)<br>1207686-1207763(+)<br>1207910-1207975(+)                                                                                                               |                           |

| Gene                     | ORF location       | Upstream intron | Intron locations                                                                                                                                                                                                | Genomic contig of NIH2624 |
|--------------------------|--------------------|-----------------|-----------------------------------------------------------------------------------------------------------------------------------------------------------------------------------------------------------------|---------------------------|
| <i>vosA-ε</i>            | 1207430-1209313(+) | yes             | 1207343-1207406(+) <sup>a</sup><br>1207512-1207615(+)<br>1207686-1207763(+)<br>1207910-1207975(+)<br>1208061-1208149(+)<br>1208197-1208254(+)<br>1208364-1208414(+)<br>1208740-1208861(+)<br>1208979-1209037(+) | Supercontig_1.5           |
| <i>vosA-ζ</i>            | 1207430-1209062(+) | yes             | 1207343-1207406(+) <sup>a</sup><br>1207512-1207615(+)<br>1207686-1207763(+)<br>1207910-1207975(+)<br>1208061-1208149(+)<br>1208197-1208254(+)<br>1208364-1208414(+)<br>1208740-1208861(+)<br>1208979-1209026(+) |                           |
| <i>vosA-η</i>            | 1207430-1209008(+) | yes             | 1207343-1207406(+) <sup>a</sup><br>1207512-1207615(+)<br>1207686-1207763(+)<br>1207910-1207975(+)<br>1208061-1208149(+)<br>1208197-1208254(+)<br>1208364-1208414(+)<br>1208740-1208861(+)                       |                           |
| <i>vosA-θ</i>            | 1207430-1208064(+) | yes             | 1207343-1207406(+) <sup>a</sup><br>1207512-1207615(+)<br>1207686-1207763(+)                                                                                                                                     |                           |
| <i>laeA-α, variant 1</i> | 1900810-1902006(+) | yes             | 1900017-1900079(+) <sup>a</sup><br>1901025-1901116(+)                                                                                                                                                           | Supercontig_1.1           |
| <i>laeA-α, variant 2</i> |                    | no              | 1901025-1901116(+)                                                                                                                                                                                              |                           |
| <i>laeA-β, variant 1</i> | 1901184-1902006(+) | yes             | 1900017-1900079(+) <sup>a</sup>                                                                                                                                                                                 |                           |
| <i>laeA-β, variant 2</i> |                    | no              | -                                                                                                                                                                                                               |                           |

<sup>a</sup> upstream intron

ND; not detected
