# Supplementary material for: Transcriptomic Complexity of Aspergillus terreus Velvet Gene Family under the Influence of Butyrolactone I
Source: MDPI journal article supplement (doi:10.3390/microorganisms5010012), 2017-03-14
Supplement: s1 [file s1]

**Table S4.** Sequenced transcript details regarding the core regulators of conidiation (*brlA*, *abaA*, *wetA*) and spore viability providing trehalose biosynthase (*tpsA*).

| Gene        | ORF<br>length (bp) | Gene<br>length (bp) <sup>a</sup> | Transcript<br>length (bp) <sup>b</sup> | Number of<br>exons (introns) | Residue identity (%) with<br><i>A. nidulans</i> ortholog <sup>c</sup> |
|-------------|--------------------|----------------------------------|----------------------------------------|------------------------------|-----------------------------------------------------------------------|
| <i>brlA</i> | NA                 | NA                               | NA                                     | NA                           | 75 <sup>d</sup>                                                       |
| <i>abaA</i> | 2391               | 2491                             | 5745 <sup>e</sup>                      | 3 (2)                        | 62                                                                    |
| <i>wetA</i> | 1632               | 1632                             | 2700                                   | -                            | 61                                                                    |
| <i>tpsA</i> | 1542               | 1759                             | 2435                                   | 5 (4)                        | 90                                                                    |

<sup>a</sup> based on the genomic region of strain NIH2624 between 5' and 3' of the corresponding gene

<sup>b</sup> derived from the corresponding sequenced transcript of strain MUCL 38669, including sequenced up- and downstream regions with upstream introns if present

<sup>c</sup> obtained by BLASTP analysis

<sup>d</sup> the ID % is based on *brlA* annotation of strain NIH2624

<sup>e</sup> sequenced transcript covers also ATEG\_02626 gene of NIH2624 annotation  
NA; not available for strain MUCL 38669
