# Supplementary figures and images for: Transcriptomic Complexity of Aspergillus terreus Velvet Gene Family under the Influence of Butyrolactone I
Source: MDPI journal article supplement (doi:10.3390/microorganisms5010012), 2017-03-14

**Figure S2. Gene expression data in quartiles after normalisation**

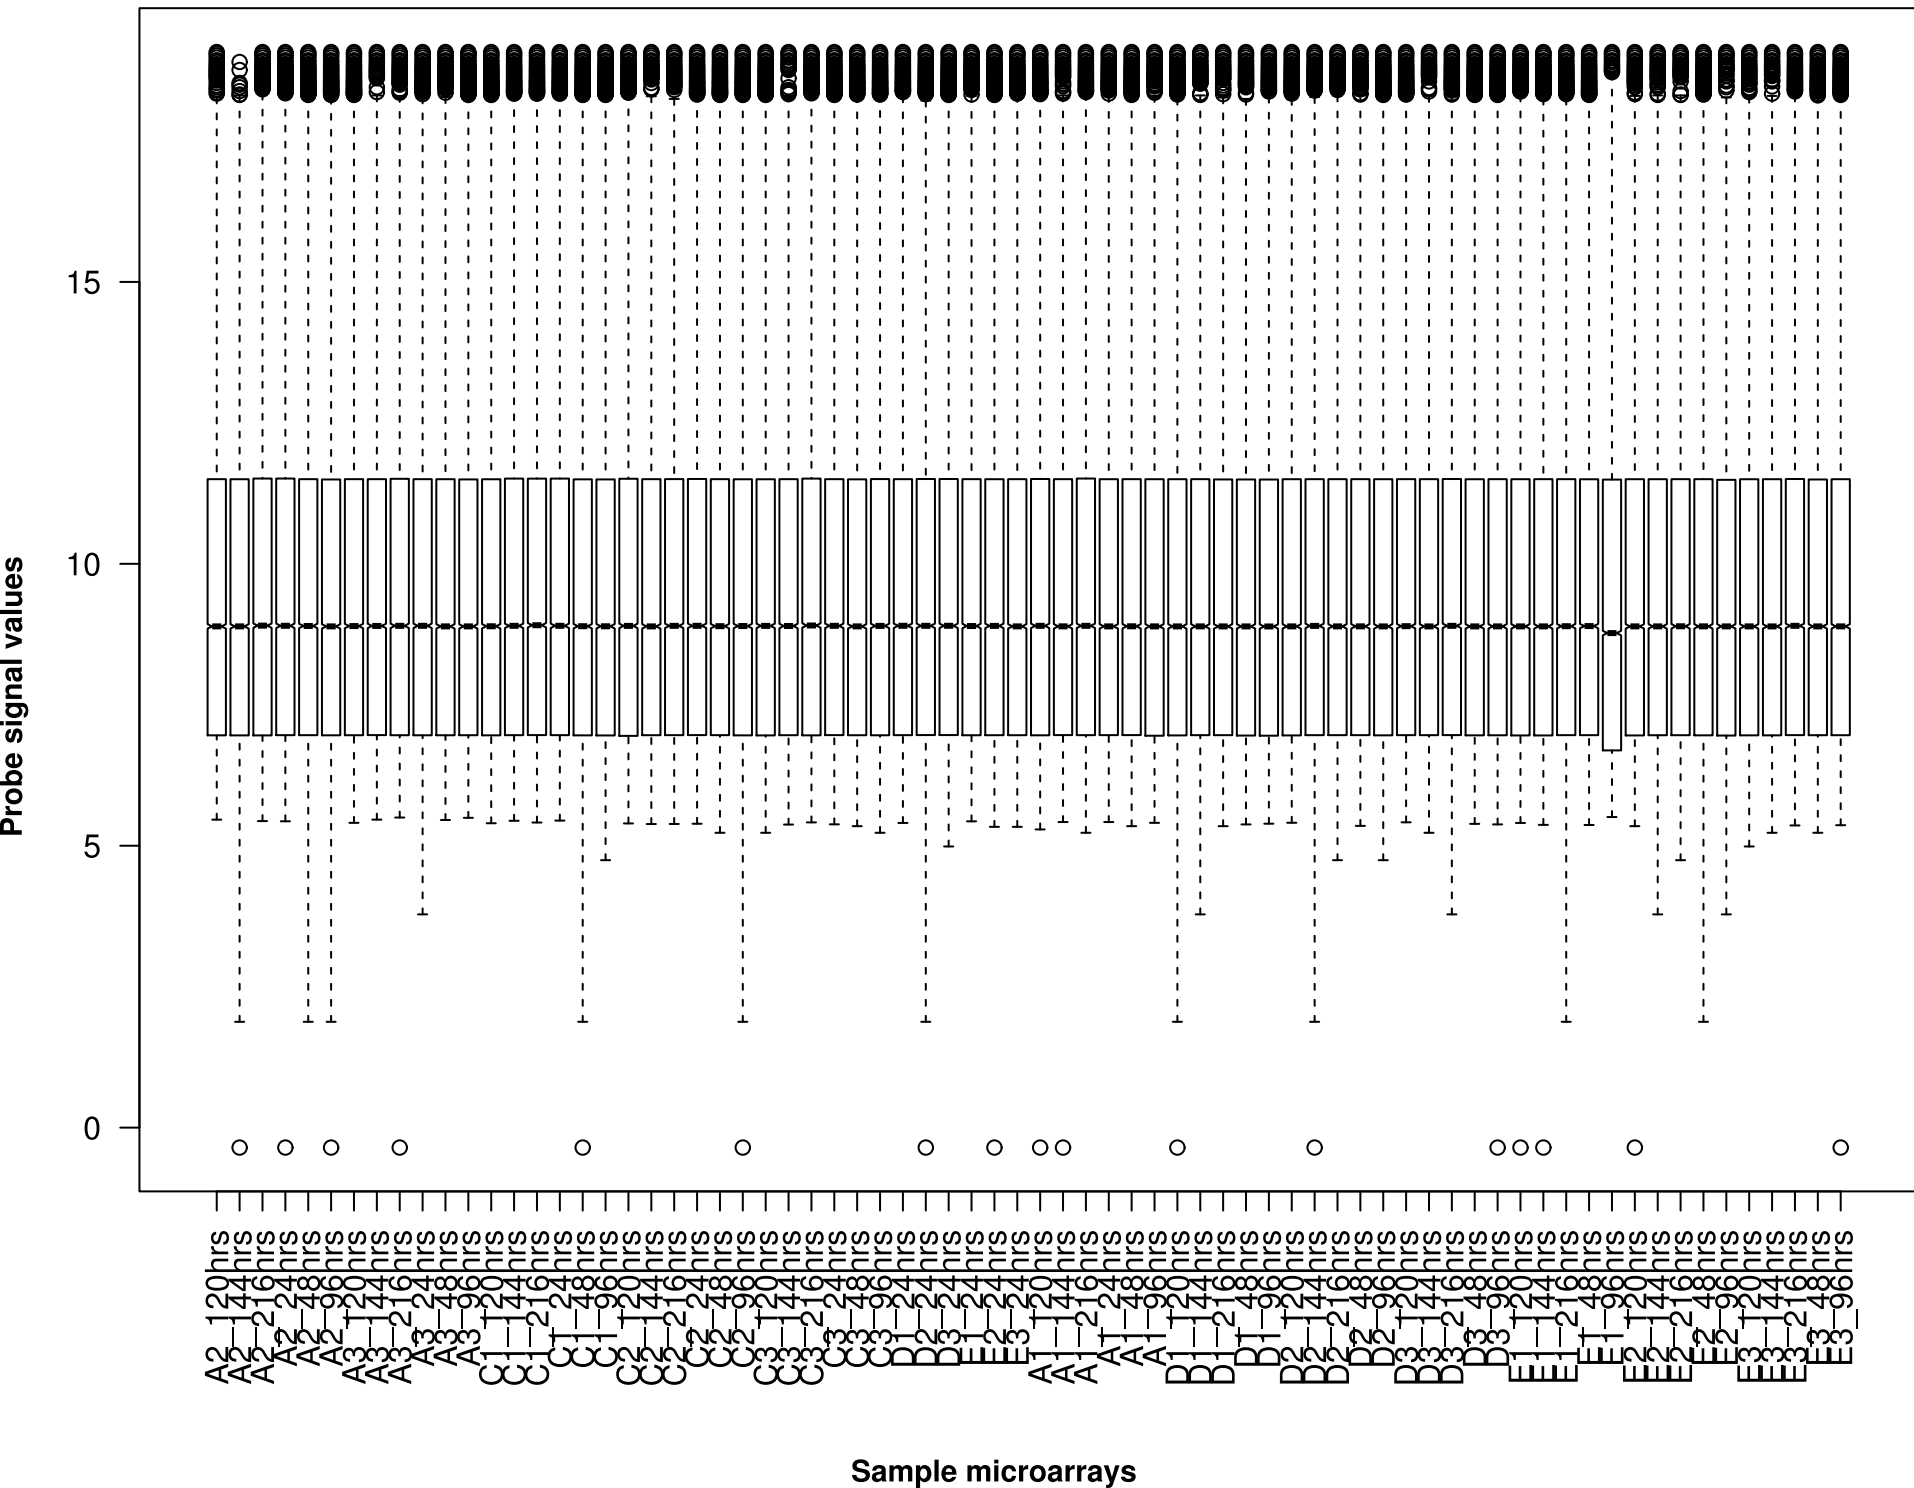

Supplement: s1 [file s1]
